# Supplementary material
Source: publisher figshare collection journal article supplement (https://asha.figshare.com/articles/dataset/_/21498711)
Supplement: Supplementary file 1 [file 1]

**Supplemental Material S3.** Prevalence ratio of subjective cognitive complaints by impairment status after restricting sample to participants aged 60-85 years in the 2019 NHIS.

| Prevalence ratio (95% CI)    |                    |
|------------------------------|--------------------|
| Status of sensory impairment | Model <sup>a</sup> |
| None                         | 1 [reference]      |
| Vision only                  | 2.06 (1.79, 2.38)  |
| Hearing only                 | 2.24 (1.98, 2.53)  |
| Dual sensory impairment      | 3.17 (2.79, 3.60)  |

*Note.* NHIS = National Health Interview Survey; CI = confidence interval. Poisson regression modeling cross-sectional association between sensory impairments and subjective cognitive complaints among participants aged  $\leq 85$  years of age in the 2019 NHIS survey. This analysis utilizes survey weights, and the results are consistent with the fully adjusted model (i.e., model 3) in the primary analysis (see Table 2 in article).

<sup>a</sup> Model adjusted for age, sex, race/ethnicity, education, marital status, smoking history, body mass index, and chronic disease score.
