# Supplementary material
Source: publisher figshare collection journal article supplement (https://asha.figshare.com/articles/dataset/_/21498711)
Supplement: Supplementary file 2 [file 1]

**Supplemental Material S1.** Description of variables derived from questions in the 2019 NHIS.

| <b>Variable</b>             | <b>Question</b>                                                                                                                                                                                                                                                                                                                                                               | <b>Value</b>                                                                                                      |
|-----------------------------|-------------------------------------------------------------------------------------------------------------------------------------------------------------------------------------------------------------------------------------------------------------------------------------------------------------------------------------------------------------------------------|-------------------------------------------------------------------------------------------------------------------|
| Dementia                    | “Have you ever been told by a doctor or other health professional that you had dementia, including Alzheimer’s disease?”                                                                                                                                                                                                                                                      | 0, No<br>1, Yes                                                                                                   |
| Depression                  | “Do you take prescription medication for depression?”                                                                                                                                                                                                                                                                                                                         | 0, No<br>1, Yes                                                                                                   |
| Hearing impairment          | <p>“Do you have difficulty hearing, even when using your hearing aid(s)? Would you say no difficulty, some difficulty, a lot of difficulty, or you cannot do this at all?”</p> <p>Respondents reporting “Some difficulty,” “A lot of difficulty,” “Cannot do at all” were classified as “yes”</p> <p>Respondents reporting “No difficulty” were classified as “no”</p>        | 0, No<br>1, Yes                                                                                                   |
| Vision impairment           | <p>“Do you have difficulty seeing, even when wearing glasses or contact lenses? Would you say no difficulty, some difficulty, a lot of difficulty, or you cannot do this at all?”</p> <p>Respondents reporting “Some difficulty,” “A lot of difficulty,” “Cannot do at all” were classified as “yes”</p> <p>Respondents reporting “No difficulty” were classified as “no”</p> | 0, No<br>1, Yes                                                                                                   |
| Sensory impairment category | Derived from the hearing impairment and vision impairment questions                                                                                                                                                                                                                                                                                                           | 0, No sensory impairment<br>1, Vision impairment only<br>2, Hearing impairment only<br>3, Dual sensory impairment |

|                                |                                                                                                                                                                                                                                                                                                                                                                                                                                                                                           |                                                                           |
|--------------------------------|-------------------------------------------------------------------------------------------------------------------------------------------------------------------------------------------------------------------------------------------------------------------------------------------------------------------------------------------------------------------------------------------------------------------------------------------------------------------------------------------|---------------------------------------------------------------------------|
|                                | <p>Respondents reporting “yes” to hearing impairment only were classified as “hearing impairment only”</p> <p>Respondents reporting “Yes” to vision impairment only were classified as “vision impairment only”</p> <p>Respondents reporting “yes” to vision impairment and “yes” to hearing impairment were classified as “dual sensory impairment”</p> <p>Respondents reporting “no” to hearing impairment and “no” to vision impairment were classified as “no sensory impairment”</p> |                                                                           |
| Subjective cognitive complaint | <p>“Do you have difficulty remembering or concentrating? Would you say no difficulty, some difficulty, a lot of difficulty, or you cannot do this at all?”</p> <p>Respondents reporting “some difficulty,” a lot of difficulty,” or “cannot do at all” were classified as “yes”</p> <p>Respondents reporting “no difficulty” were classified as “no”</p>                                                                                                                                  | <p>0, No<br/>1, Yes</p>                                                   |
| Age                            | Derived from age of sample adult                                                                                                                                                                                                                                                                                                                                                                                                                                                          | Continuous value                                                          |
| Sex                            | Derived from sex of sample adult                                                                                                                                                                                                                                                                                                                                                                                                                                                          | 0, Male<br>1, Female                                                      |
| Race/ethnicity                 | Derived from single and multiple race groups with Hispanic origin                                                                                                                                                                                                                                                                                                                                                                                                                         | 0, Non-Hispanic White<br>1, Non-Hispanic Black<br>2, Hispanic<br>3, Other |

|           |                                                                                                                                                                                                                                                                                                                                                                                                                                                                                                                                                                                              |                                                                                                                                                      |
|-----------|----------------------------------------------------------------------------------------------------------------------------------------------------------------------------------------------------------------------------------------------------------------------------------------------------------------------------------------------------------------------------------------------------------------------------------------------------------------------------------------------------------------------------------------------------------------------------------------------|------------------------------------------------------------------------------------------------------------------------------------------------------|
|           | <p>Respondents reporting “NH White only” were classified as “Non-Hispanic White”</p> <p>Respondents reporting “NH Black/African American only” were classified as “Non-Hispanic Black”</p> <p>Respondents reporting “Hispanic” were classified as “Hispanic”</p> <p>Respondents reporting “NH Asian only,” “NH AIAN only,” “NH AIAN and any other group,” or “Other single and multiple races” were classified as “Other”</p>                                                                                                                                                                |                                                                                                                                                      |
| Education | <p>Derived from level of educational attainment</p> <p>Respondents reporting “Never attended/kindergarten only,” “Grade 1-11,” or “12<sup>th</sup> grade, no diploma” were classified as “&lt; High school diploma”</p> <p>Respondents reporting “GED or equivalent” or “High school graduate” were classified as “High school diploma or equivalent”</p> <p>Respondents reporting “Some college, no degree,” “Associate degree: occupational, technical, or vocational program,” “Associate degree: academic program,” or “Bachelor’s degree” were classified as “some or full college”</p> | <p>0, &lt; High school diploma</p> <p>1, High school diploma or equivalent</p> <p>2, Some or full college</p> <p>3, Graduate/professional degree</p> |

|                |                                                                                                                                                                                                                                                                                                                                                    |                                                                            |
|----------------|----------------------------------------------------------------------------------------------------------------------------------------------------------------------------------------------------------------------------------------------------------------------------------------------------------------------------------------------------|----------------------------------------------------------------------------|
|                | <p>Respondents reporting “Master’s degree,” “Professional school degree,” or “Doctoral degree” were classified as “graduate/professional degree”</p>                                                                                                                                                                                               |                                                                            |
| Marital status | <p>“Are you now married, living with a partner together as an unmarried couple, or neither?”</p> <p>Respondents reporting “married” or “living with a partner together as an unmarried couple” were classified as “married or living with partner”</p> <p>Respondents reporting “neither” were classified as “neither”</p>                         | <p>0, Neither<br/>1, Married or living with partner</p>                    |
| Smoking        | <p>Derived from cigarette smoking status of sample adult</p> <p>Respondents reporting “current everyday smoker” or “current some day smoker” were classified as “current smoker”</p> <p>Respondents reporting “former smoker” were classified as “former smoker”</p> <p>Respondents reporting “never smoker” were classified as “never smoker”</p> | <p>0, Never smoker<br/>1, Former smoker<br/>2, Current smoker</p>          |
| BMI            | <p>Categorical BMI, derived from height and weight</p> <p>Respondents with BMI &lt; 18.5 were classified as “underweight,” BMI 18.5-24.99 were classified as</p>                                                                                                                                                                                   | <p>0, Healthy weight<br/>1, Overweight<br/>2, Obese<br/>3, Underweight</p> |

|                       |                                                                                                                                                     |                       |
|-----------------------|-----------------------------------------------------------------------------------------------------------------------------------------------------|-----------------------|
|                       | “healthy weight,” BMI 25-29.99 were classified as “overweight,” and BMI > 30 were classified as “obese”                                             |                       |
| Chronic disease score | Derived from the presence of the following six variables (e.g., reporting “yes” for two of the following conditions would result in a value of “2”) | Continuous value, 0-6 |
| Diabetes              | “Has a doctor or other health professional ever told you that you had diabetes [not including gestational diabetes, prediabetes]?”                  | 0, No<br>1, Yes       |
| Hypertension          | “Have you ever been told by a doctor or other health professional that you had hypertension, also called high blood pressure?”                      | 0, No<br>1, Yes       |
| Stroke                | “Have you ever been told by a doctor or other health professional that you had a stroke?”                                                           | 0, No<br>1, Yes       |
| Heart disease         | “Have you ever been told by a doctor or other health professional that you had coronary heart disease?”                                             | 0, No<br>1, Yes       |
| Cancer                | “Have you ever been told by a doctor or other health professional that you had cancer or a malignancy of any kind?”                                 | 0, No<br>1, Yes       |
| Arthritis             | “Have you ever been told by a doctor or other health professional that you had some form of arthritis, gout, lupus, or fibromyalgia?”               | 0, No<br>1, Yes       |

*Note.* NHIS = National Health Interview Survey; BMI = body mass index. Description of the variables derived from questions in the 2019 National Health Interview Survey.
