# Supplementary material
Source: publisher figshare collection journal article supplement (https://asha.figshare.com/articles/dataset/_/21498711)
Supplement: Supplementary file 3 [file 1]

**Supplemental Material S2.** Interaction between impairment status and age category on subjective cognitive complaints among eligible participants in the 2019 NHIS.

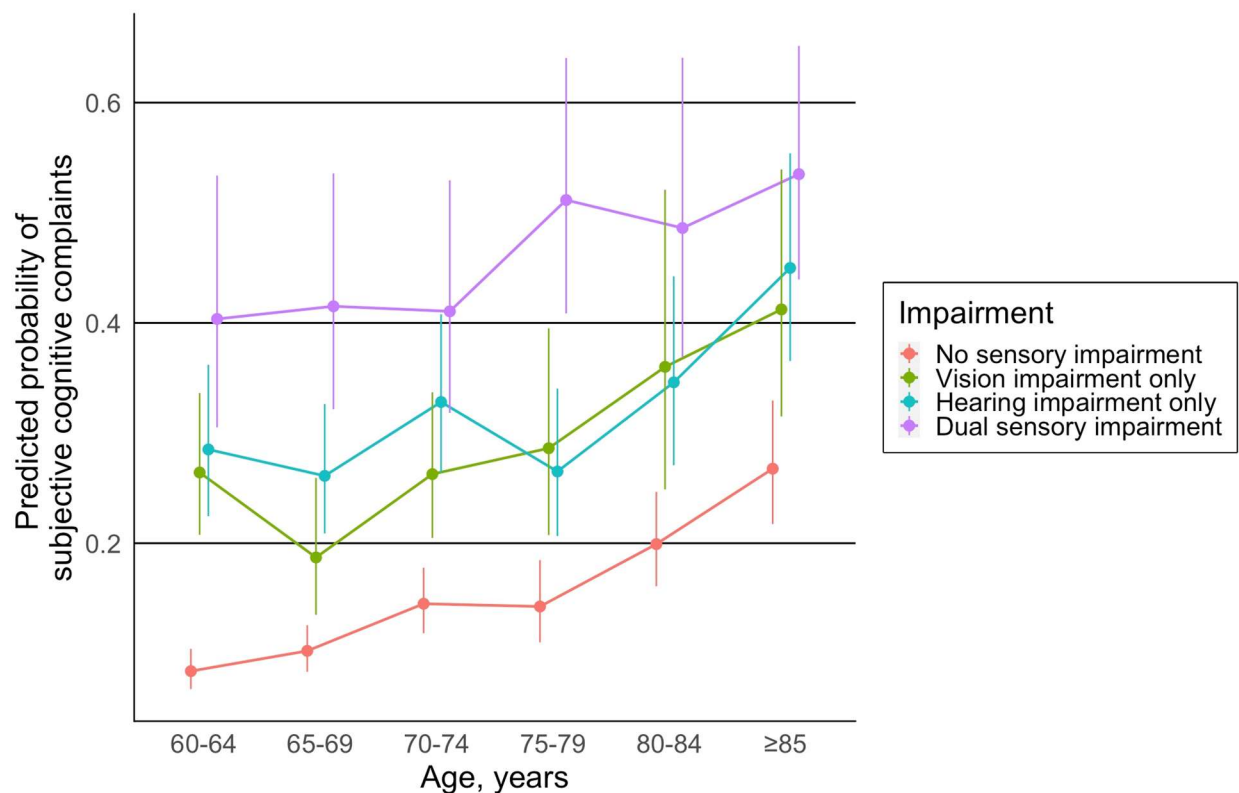

*Note.* NHIS = National Health Interview Survey; DSI = dual sensory impairment; SCC = subjective cognitive complaints. Interaction between impairment status and age category on subjective cognitive complaints among eligible participants in the 2019 NHIS survey. Error bars indicate 95% confidence intervals. These data indicate interactions between impairment and age category on prevalence of subjective cognitive complaints tend to be more pronounced among higher age categories, such that associations between DSI category and SCC were weaker in older age categories.
